# Supplementary material
Source: MDPI journal article supplement (https://www.mdpi.com/2073-4441/15/15/2833)
Supplement: s1 [file s1]

**Table S1.** Results for reference material NCSDC 73377 achieved by means of AAS technique, (n = 5, p = 95%).

| <b>Metal</b> | <b>Certified value NCSDC 73377 (mg/kg)</b> | <b>AAS (mg/kg)</b> |
|--------------|--------------------------------------------|--------------------|
| Cd           | 0.14 ± 0.02                                | 0.15 ± 0.04        |
| Pb           | 8.0 ± 0.5                                  | 7.5 ± 0.6          |
| Cu           | 84 ± 5                                     | 82 ± 4             |
| Ni           | 117 ± 10                                   | 119 ± 11           |
| Zn           | 100 ± 12                                   | 105 ± 15           |

**Table S2.** Conditions and parameters of AAS analysis Cd, Pb, Cu, Ni, Zn.

| <b>Metal</b> | <b>Wavelength<br/>(nm)</b> | <b>Gap width<br/>(nm)</b> | <b>Detection range<br/>(mg/L)</b> | <b>Precision<br/>(%)</b> | <b>Accuracy<br/>(%)</b> |
|--------------|----------------------------|---------------------------|-----------------------------------|--------------------------|-------------------------|
| Cd           | 228.8                      | 0.5                       | 0.002-4                           | 10                       | 20                      |
| Pb           | 217.0                      | 1.0                       | 0.002-10                          | 10                       | 20                      |
| Cu           | 324.7                      | 0.5                       | 0.003-5                           | 10                       | 20                      |
| Ni           | 232.0                      | 0.2                       | 0.01-10                           | 10                       | 20                      |
| Zn           | 213.9                      | 1.0                       | 0.01-15                           | 10                       | 20                      |
